# Supplementary material for: Surface specific adsorption of glucose to ZnO
Source: Royal Society of Chemistry journal article supplement (doi:10.1039/d2cp05749b), 2023-01-01
Supplement: d2cp05749b1.pdf [file d2cp05749b1.pdf]

## Surface specific adsorption of glucose to ZnO

Sasthi Charan Mandal<sup>1,\*</sup>, Jaydeb Chakrabarti<sup>1,2,\*</sup>

<sup>1</sup>*Department of Physics of Complex Systems, S.N. Bose National Centre for Basic Sciences, Block JD, Sector III, Salt Lake, Kolkata 700106, India.*

<sup>2</sup>*Also at: Department of Chemical, Biological Sciences, S.N. Bose National Centre for Basic Sciences, Block JD, Sector III, Salt Lake, Kolkata 700 106, India; Also, at The Thematic Unit of Excellence on Computational Materials Science, and Technical Research Centre, S. N. Bose National Centre for Basic Sciences, Block JD, Sector III, Salt Lake, Kolkata 700106, India.*

\*Corresponding author: [sasthi.phys@gmail.com](mailto:sasthi.phys@gmail.com), [jaydeb@bose.res.in](mailto:jaydeb@bose.res.in)

## Contents of SI

1. Fig. S1: Initial geometries of the slabs.
2. Fig. S2. Optimized geometries of the slabs and glucose.
3. Fig. S3. Definitions of the surface vectors for  $(11\bar{2}0)$ ,  $(0001)$ , and  $(000\bar{1})$  surfaces.
4. Fig. S4. Umbrella histograms for the surfaces.
5. Fig. S5. MD snapshots of interactions between glucose and the surface via water molecules for  $(10\bar{1}0)$  and  $(11\bar{2}0)$  surfaces.

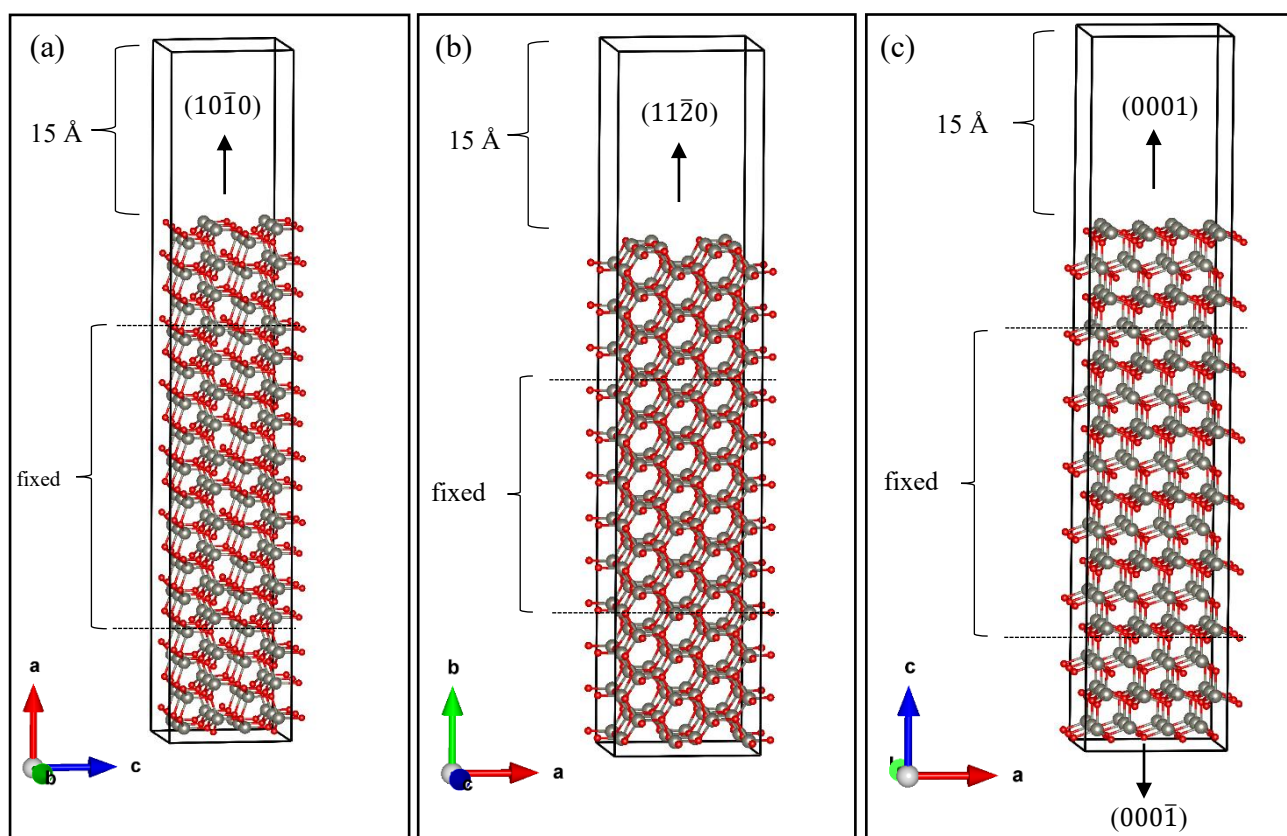

Fig. S1. Initial geometries of (a)  $(10\bar{1}0)$ , (b)  $(11\bar{2}0)$  and (c)  $(0001)$  and  $(000\bar{1})$  surfaces. For all the slabs, the first six layers on both sides are relaxed in all directions, while the other layers in the middle are fixed, shown in dotted lines. A vacuum of 15 Å is included above the surfaces.

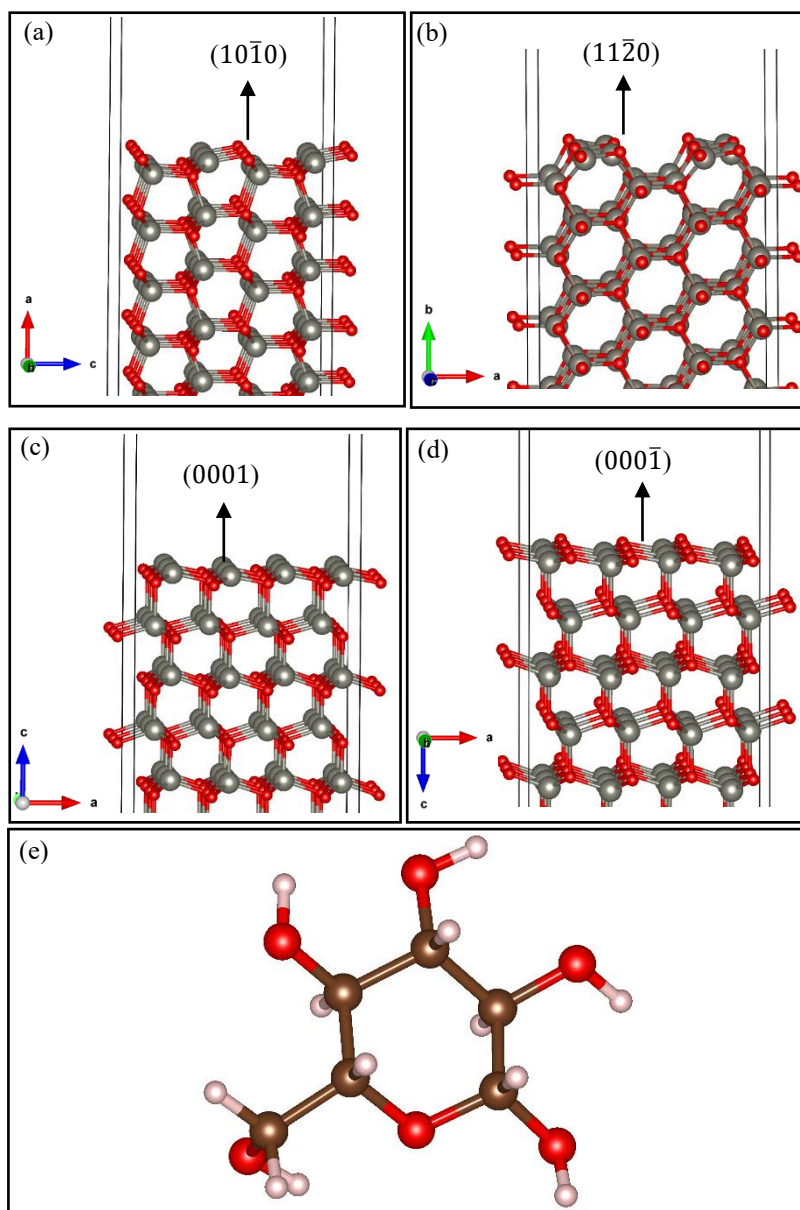

Fig. S2. Optimized geometries of (a)  $(10\bar{1}0)$ , (b)  $(11\bar{2}0)$ , (c)  $(0001)$ , (d)  $(000\bar{1})$  surfaces and (e) glucose.

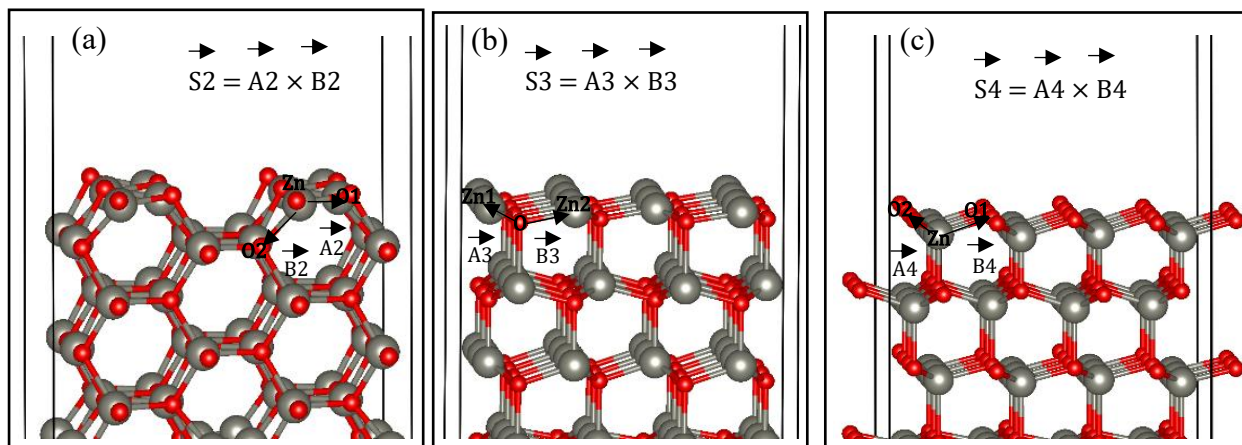

Fig. S3. Definitions of surface vectors for (a)  $(11\bar{2}0)$ , (b)  $(0001)$ , and (c)  $(000\bar{1})$  surfaces.

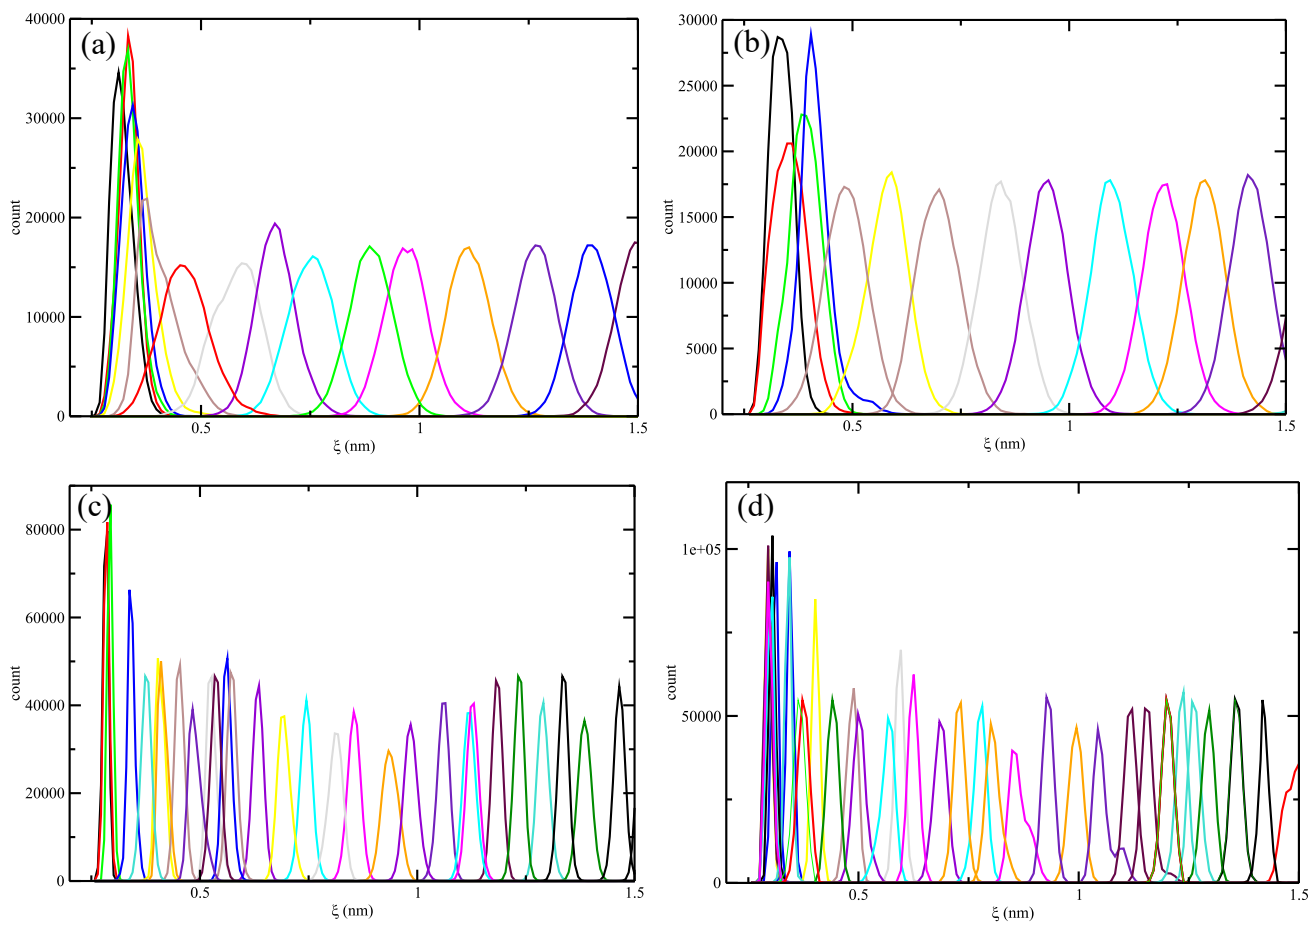

Fig. S4. Umbrella histograms for (a)  $(10\bar{1}0)$ , (b)  $(11\bar{2}0)$ , (c)  $(0001)$ , and (d)  $(000\bar{1})$  surfaces.

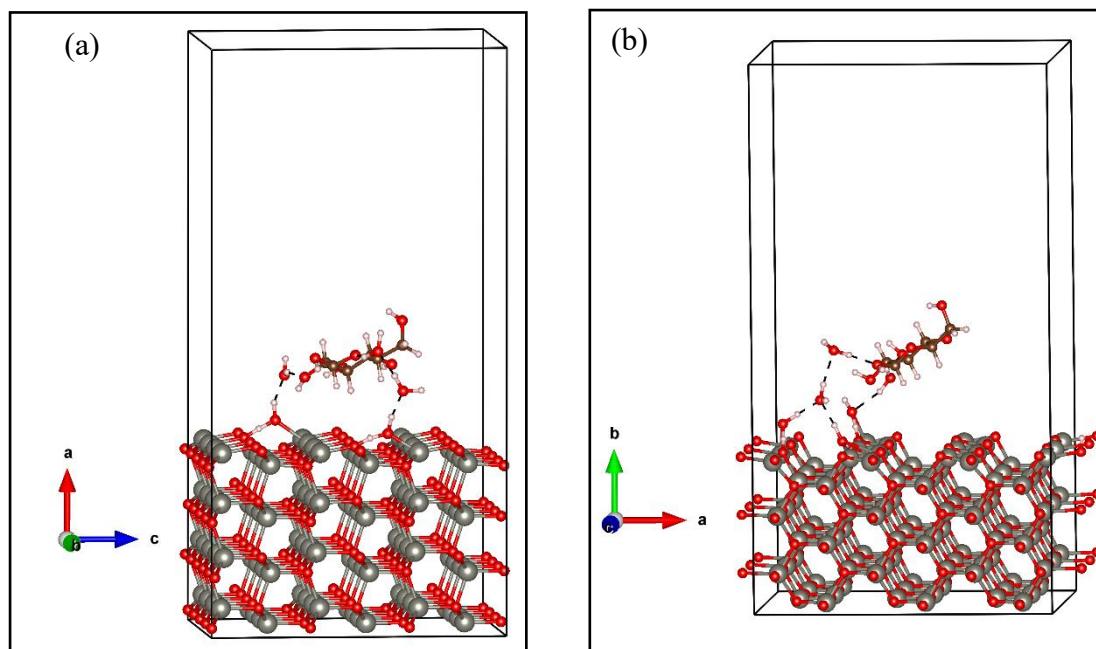

Fig. S5. MD snapshots of interactions between glucose and the surface via water molecules for (a)  $(10\bar{1}0)$  and (b)  $(11\bar{2}0)$  surfaces used for QM calculations.
